# Supplementary material
Source: PubMed Central journal article supplement (PMC549024)
Supplement: pnas_102_7_2442__2.pdf [file pnas_102_7_2442__2.pdf]

**Adh1**

|   | Haplotypes | Frequency |
|---|------------|-----------|
| 1 | 000100     | 8         |
| 2 | 001010     | 7         |
| 3 | 000001     | 6         |
| 4 | 110100     | 3         |
| 5 | 000000     | 1         |

**Adh2**

|   | Haplotypes     | Frequency |
|---|----------------|-----------|
| 1 | 10001000000000 | 9         |
| 2 | 10100000011100 | 3         |
| 3 | 01000111100000 | 2         |
| 4 | 00010111100000 | 2         |
| 5 | 00001000000000 | 2         |
| 6 | 00000111100011 | 2         |
| 7 | 00000111100000 | 2         |
| 8 | 00000000000000 | 2         |
| 9 | 00000010100011 | 1         |

**Adh3**

|    | Haplotypes                                                                        | Frequency |
|----|-----------------------------------------------------------------------------------|-----------|
| 1  | 11111100111111011011111111011111111111100011101011111011111111111111111111111110  | 3         |
| 2  | 00000010000000000000000000000000000000000000000000000000000000000000000000000000  | 3         |
| 3  | 11111100111111011111111111011111111111100011101011111010111111111111111111111101  | 2         |
| 4  | 00000011000000000000000000100000000000001000001000001000000000000000000000000000  | 2         |
| 5  | 00000011000000000000000000000000000000000000000000000000000000000000000000000000  | 2         |
| 6  | 00000010000000000000000000000000000000000000000000000000000000000000000000000000  | 2         |
| 7  | 00000000000000000000000000000000000000000000000000000000000000000000000000000000  | 2         |
| 8  | 111111001111111101111111110111111111111000111110110000101111111111111111111111101 | 1         |
| 9  | 111111001111111101111111110111111111111000111110110000101111111111111111111111100 | 1         |
| 10 | 1111110011111101111111111101111111111110011101011111010111111111111111111111100   | 1         |
| 11 | 11111100111111011011111111011111111111110011101011111010111111111111111111111101  | 1         |
| 12 | 11111100111111011011111111011111111111100011101011111010111111111111111111111101  | 1         |
| 13 | 11111100111111011011111111011111111111100011101011111010111111111111111111111100  | 1         |
| 14 | 11111100111111011011111111011111111111100011101011000010111111111111111111111101  | 1         |
| 15 | 00000011000000000000000000000000000000000000000000000000000000000000000000000000  | 1         |
| 16 | 00000010000000000000000000000000000000000000000000000000000000000000000000000001  | 1         |

***α-amy1***

|   | Haplotypes | Frequency |
|---|------------|-----------|
| 1 | 000        | 22        |
| 2 | 111        | 2         |
| 3 | 100        | 1         |

***Cbf3***

|    | Haplotypes                | Frequency |
|----|---------------------------|-----------|
| 1  | 0000000000000000001000000 | 10        |
| 2  | 0100000001011010000100000 | 4         |
| 3  | 1010000000000100000001110 | 2         |
| 4  | 0001000001000011110010001 | 2         |
| 5  | 0000011110001010000100000 | 2         |
| 6  | 101000000000000000001110  | 1         |
| 7  | 100010000010000000000100  | 1         |
| 8  | 0100000000000010000100000 | 1         |
| 9  | 000010000010000000000100  | 1         |
| 10 | 0000011110001110000100010 | 1         |
| 11 | 0000011110001010000100-00 | 1         |

***Dhn1***

|    | Haplotypes                                              | Frequency |
|----|---------------------------------------------------------|-----------|
| 1  | 0001110101000110000000001000010000100000000000000000000 | 5         |
| 2  | 0000000000011000000110010001000100000000001100000001101 | 3         |
| 3  | 101000001---0000001000001000110000010000010001010000000 | 2         |
| 4  | 000001000010000001000000010001001000010100000001010010  | 2         |
| 5  | 0000001000100000100000000000000000001100011100000000--  | 2         |
| 6  | -----                                                   | 2         |
| 7  | 110110000000000000100100100011000000000000001000000000  | 1         |
| 8  | 1010000010000101000000100000001010001001001000000100100 | 1         |
| 9  | 1010000000010000000110010001000000000000001000000001100 | 1         |
| 10 | 101000000---0100000000000000001000001000001000100100000 | 1         |
| 11 | 0101100010000101000000100000001010001001001000000100100 | 1         |
| 12 | 000001000000000000100000100011010000000000001000000000  | 1         |
| 13 | 0000000000100000000-----0000000--0100100001000100000000 | 1         |
| 14 | 000000000000010000000000000000000000---0010000000000000 | 1         |
| 15 | 00000000000001000-----10000000000010000000000000000000  | 1         |

**Dhn4**

|    | Haplotypes                     | Frequency |
|----|--------------------------------|-----------|
| 1  | 0000011111111111011111101100   | 7         |
| 2  | 00000000000000000000000010000  | 4         |
| 3  | 10000000000000000010000000001  | 3         |
| 4  | 00000000000000000000000000010  | 3         |
| 5  | 111100000000000000000000010000 | 2         |
| 6  | 111100000001000000000000010000 | 1         |
| 7  | 100010000000000000000000010000 | 1         |
| 8  | 100000000100000000000000010000 | 1         |
| 9  | 0111011111111111011111101110   | 1         |
| 10 | 000010000000000000000000010000 | 1         |
| 11 | ----0000000000000000000001000- | 1         |

**Dhn5**

|    | Haplotypes                  | Frequency |
|----|-----------------------------|-----------|
| 1  | 000111111100100010000000011 | 4         |
| 2  | 00100000000100000000000000  | 3         |
| 3  | 10100000000100000000000000  | 2         |
| 4  | 010000000001000101001111100 | 2         |
| 5  | -----110000011              | 2         |
| 6  | 100111111100100010000000011 | 1         |
| 7  | 100110011100100010000001001 | 1         |
| 8  | 10000000001001100000000000  | 1         |
| 9  | 100000000001000101001111100 | 1         |
| 10 | 100000000001000101001111011 | 1         |
| 11 | 001000000001000101001111100 | 1         |
| 12 | 000111100100000100000000011 | 1         |
| 13 | 000000000010011000000000100 | 1         |
| 14 | 00000000001001000000000000  | 1         |
| 15 | 00000000001001100000000000  | 1         |
| 16 | 00000000000100010000000000  | 1         |
| 17 | 000000000000000001000000010 | 1         |

**Dhn7**

|    | Haplotypes                                              | Frequency |
|----|---------------------------------------------------------|-----------|
| 1  | 0000011000110000--01011111110111110000010000000000      | 5         |
| 2  | 10000000100000000000000000000000000000000000000000      | 3         |
| 3  | 0100000010000000000000000000000000000000110001000000000 | 3         |
| 4  | 0011000011001111011000000000000000000000000011110011    | 3         |
| 5  | 0000000010000000010001111110111000001000000000000       | 2         |
| 6  | 00000000000000001000100000001000011110011000001000      | 2         |
| 7  | 0111100100000000--0000000010000000000000011110100       | 1         |
| 8  | 0101100100000010--00000010110000000000000000000000      | 1         |
| 9  | 00110000110011110110000000000000000000000000000000      | 1         |
| 10 | 001100001000000000000000000000000000000000000000000     | 1         |
| 11 | 0011000000010010--010110111100110000000000111110011     | 1         |
| 12 | 00010110000100000001011111101110000000000000000000      | 1         |
| 13 | 0000011000110000--01011100000000011010100100000100      | 1         |
| 14 | 00000110000100000001011100000000000000000000000001      | 1         |
| 15 | 0000011000010000--0101111111011111000001000000000000    | 1         |

**Dhn9**

|   | Haplotypes | Frequency |
|---|------------|-----------|
| 1 | 000000000  | 9         |
| 2 | 111011000  | 8         |
| 3 | 110000000  | 3         |
| 4 | 000100011  | 2         |
| 5 | 000000100  | 2         |
| 6 | 110000100  | 1         |



**ORF1**

|    | Haplotypes              | Frequency |
|----|-------------------------|-----------|
| 1  | 00010000000000000000    | 4         |
| 2  | 0000000100011101100001  | 4         |
| 3  | 00000000000000010000100 | 4         |
| 4  | 0000111011111101000001  | 3         |
| 5  | 0000000000000000000000  | 3         |
| 6  | 0100000000000000000000  | 2         |
| 7  | 0000111011111101011011  | 2         |
| 8  | 0000000000011101000001  | 2         |
| 9  | 1110000000000010000100  | 1         |
| 10 | 1110000000000000000000  | 1         |
| 11 | 0000000000000000000100  | 1         |

**Pepc (combined)**

|   | Haplotypes | Frequency |
|---|------------|-----------|
| 1 | 0001       | 11        |
| 2 | 0100       | 9         |
| 3 | 0000       | 3         |
| 4 | 1011       | 2         |

**Stk**

|    | Haplotypes             | Frequency |
|----|------------------------|-----------|
| 1  | 0010000000100010-0100  | 6         |
| 2  | 000000100000000001000  | 4         |
| 3  | 010010000101010100001  | 3         |
| 4  | 00110100000000000000   | 3         |
| 5  | 010000011000001000000  | 2         |
| 6  | 000000000000101010010  | 2         |
| 7  | 100000011000001000000  | 1         |
| 8  | 1000000000100010-0100  | 1         |
| 9  | 001000000101010100001  | 1         |
| 10 | 000000000100010100001  | 1         |
| 11 | 0000000000000001000000 | 1         |
| 12 | 000000000000000000000  | 1         |

**Vrn1**

|    | Haplotypes | Frequency |
|----|------------|-----------|
| 1  | 0000100000 | 6         |
| 2  | -----      | 6         |
| 3  | 1010000001 | 2         |
| 4  | 1000001011 | 2         |
| 5  | 0100010110 | 2         |
| 6  | 0100000100 | 2         |
| 7  | 1101000110 | 1         |
| 8  | 1101000010 | 1         |
| 9  | 1000000001 | 1         |
| 10 | 0100100010 | 1         |
| 11 | 0100010100 | 1         |



**Waxy**

|    | Haplotypes                 | Frequency |
|----|----------------------------|-----------|
| 1  | 00100001001111001000001000 | 3         |
| 2  | 1100000000111100001100000  | 2         |
| 3  | 1010001001111000101110000  | 2         |
| 4  | 1010000000000010011100111  | 2         |
| 5  | 1000110000010000000000110  | 2         |
| 6  | 0000000000000001000010110  | 2         |
| 7  | 1000110000111000000000000  | 1         |
| 8  | 1000000000111001000001000  | 1         |
| 9  | 1000000000000001000010110  | 1         |
| 10 | 1000000000000000001100110  | 1         |
| 11 | 1000000000000000000000110  | 1         |
| 12 | 0010000000111001000001000  | 1         |
| 13 | 0001000010000000001100110  | 1         |
| 14 | 0001000010000000000000000  | 1         |
| 15 | 0000110001111001101110110  | 1         |
| 16 | 00000000000000100101100000 | 1         |
| 17 | 0000000000000001000010000  | 1         |
| 18 | 0000000000000001000000110  | 1         |
| 19 | 000000000000000001100110   | 1         |
| 20 | 000000000000000001100000   | 1         |
