# Supplementary material
Source: PubMed Central journal article supplement (PMC549024)
Supplement: pnas_102_7_2442__4.pdf [file pnas_102_7_2442__4.pdf]

**Adh1\_Adh2**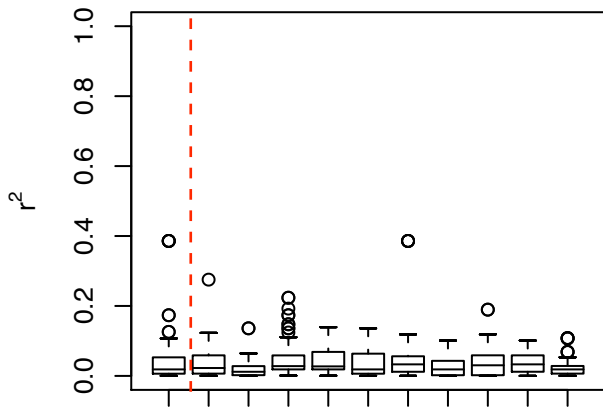

Replicates

**Adh2\_Dhn5**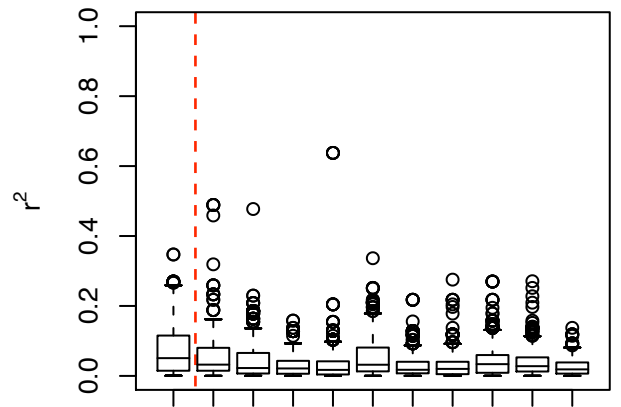

Replicates

**Cbf3\_Dhn7**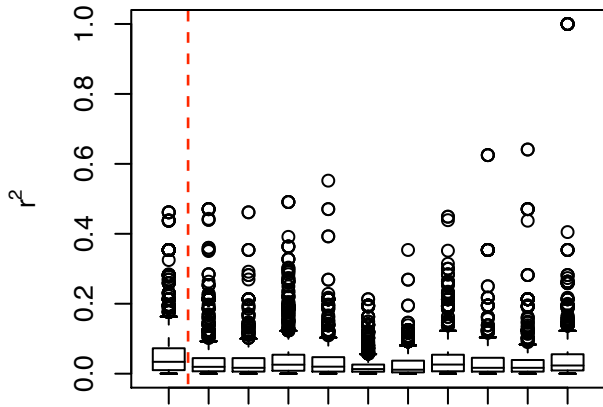

Replicates

**Dhn4\_G3pdh**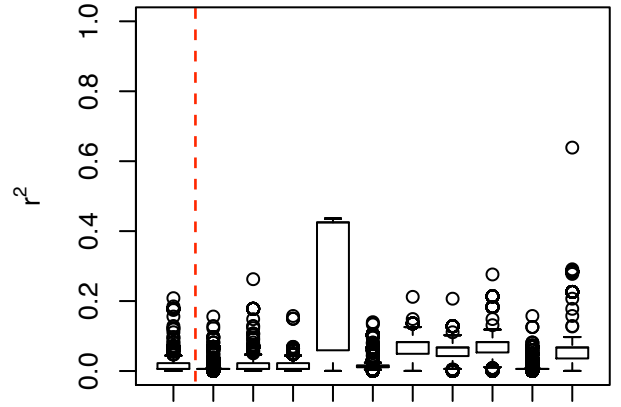

Replicates

**Dhn5\_Dhn7**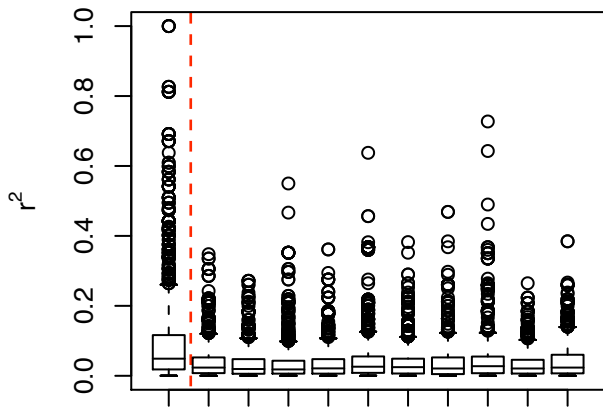

Replicates

**ORF1\_Stk**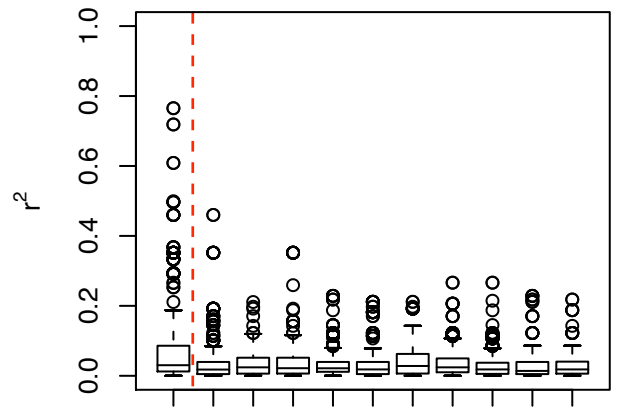

Replicates
